# Supplementary material for: Cultivating Connections: An Interprofessional Peer Support Model
Source: Atypon-hosted journal article supplement (doi:10.1176/appi.ps.20240104), 2024-09-23
Supplement: appi.ps.20240104.ds001.pdf [file appi.ps.20240104.ds001.pdf]

## Peer Support Encounter Flow Checklist

- Introduced self
- Oriented to peer support role
- Actively listened
- Reflected responses to demonstrate understanding
- Asked open ended questions as needed to explore
- Allowed individual to respond (embrace silence)
- Convey empathy
- Shared own experiences as relevant
- Reframed to gain perspective, as needed
- Focused on strengths and self-care **to elicit colleague's own coping strategies**
- Summarized and **link to resources if relevant**
- Set next date and time to talk, if relevant

Chantal Brazeau, MD, Professor of Family Medicine and Psychiatry, NJMS, Assistant Dean for Faculty Vitality, NJMS and RWJMS, Chief Wellness Officer, RBHS [chantal.brazeau@rutgers.edu](mailto:chantal.brazeau@rutgers.edu)

Margaret (Peggy) Swarbrick, PhD, FAOTA, ScarletWell Director and Research Professor, Graduate School of Applied and Professional Psychology, [swarbrma@ubhc.rutgers.edu](mailto:swarbrma@ubhc.rutgers.edu)
